# Supplementary material for: HPLC separation of casein components on a diol-bonded silica column with MALDI TOF/TOF MS identification
Source: Royal Society of Chemistry journal article supplement (doi:10.1039/c4ay00895b), 2014-01-01
Supplement: c4ay00895b2.pdf [file c4ay00895b2.pdf]

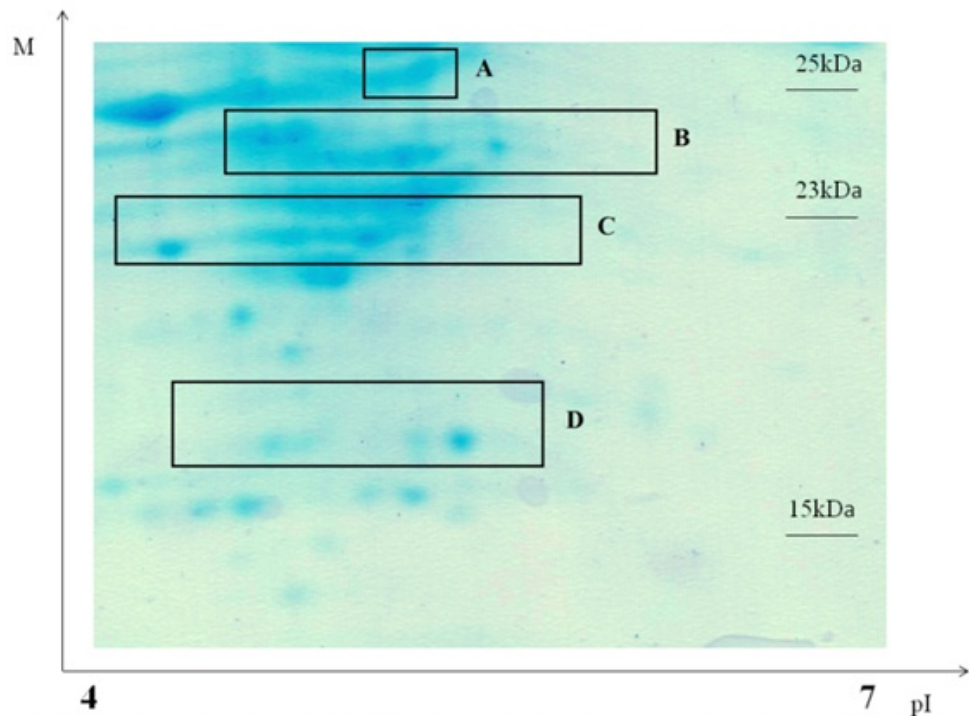

**Supplement 1.** 2-D gel of casein from bovine milk; the first dimension was IEF on 7 cm pH 4-7 IPG strips and the second dimension was SDS-PAGE on 12% gels (10×10 cm); the spots of proteins were stained with Bio-Safe Coomassie, excited and analyzed in spectrometric analysis. A)  $\alpha_{s2}$ -; B)  $\beta$ -; C)  $\alpha_{s1}$ - and D)  $\kappa$ -casein
